# Supplementary material
Source: publisher site journal article supplement (https://www.dovepress.com/article/237536)
Supplement: Supplementary file 1 [file get_supplementary_file.php]

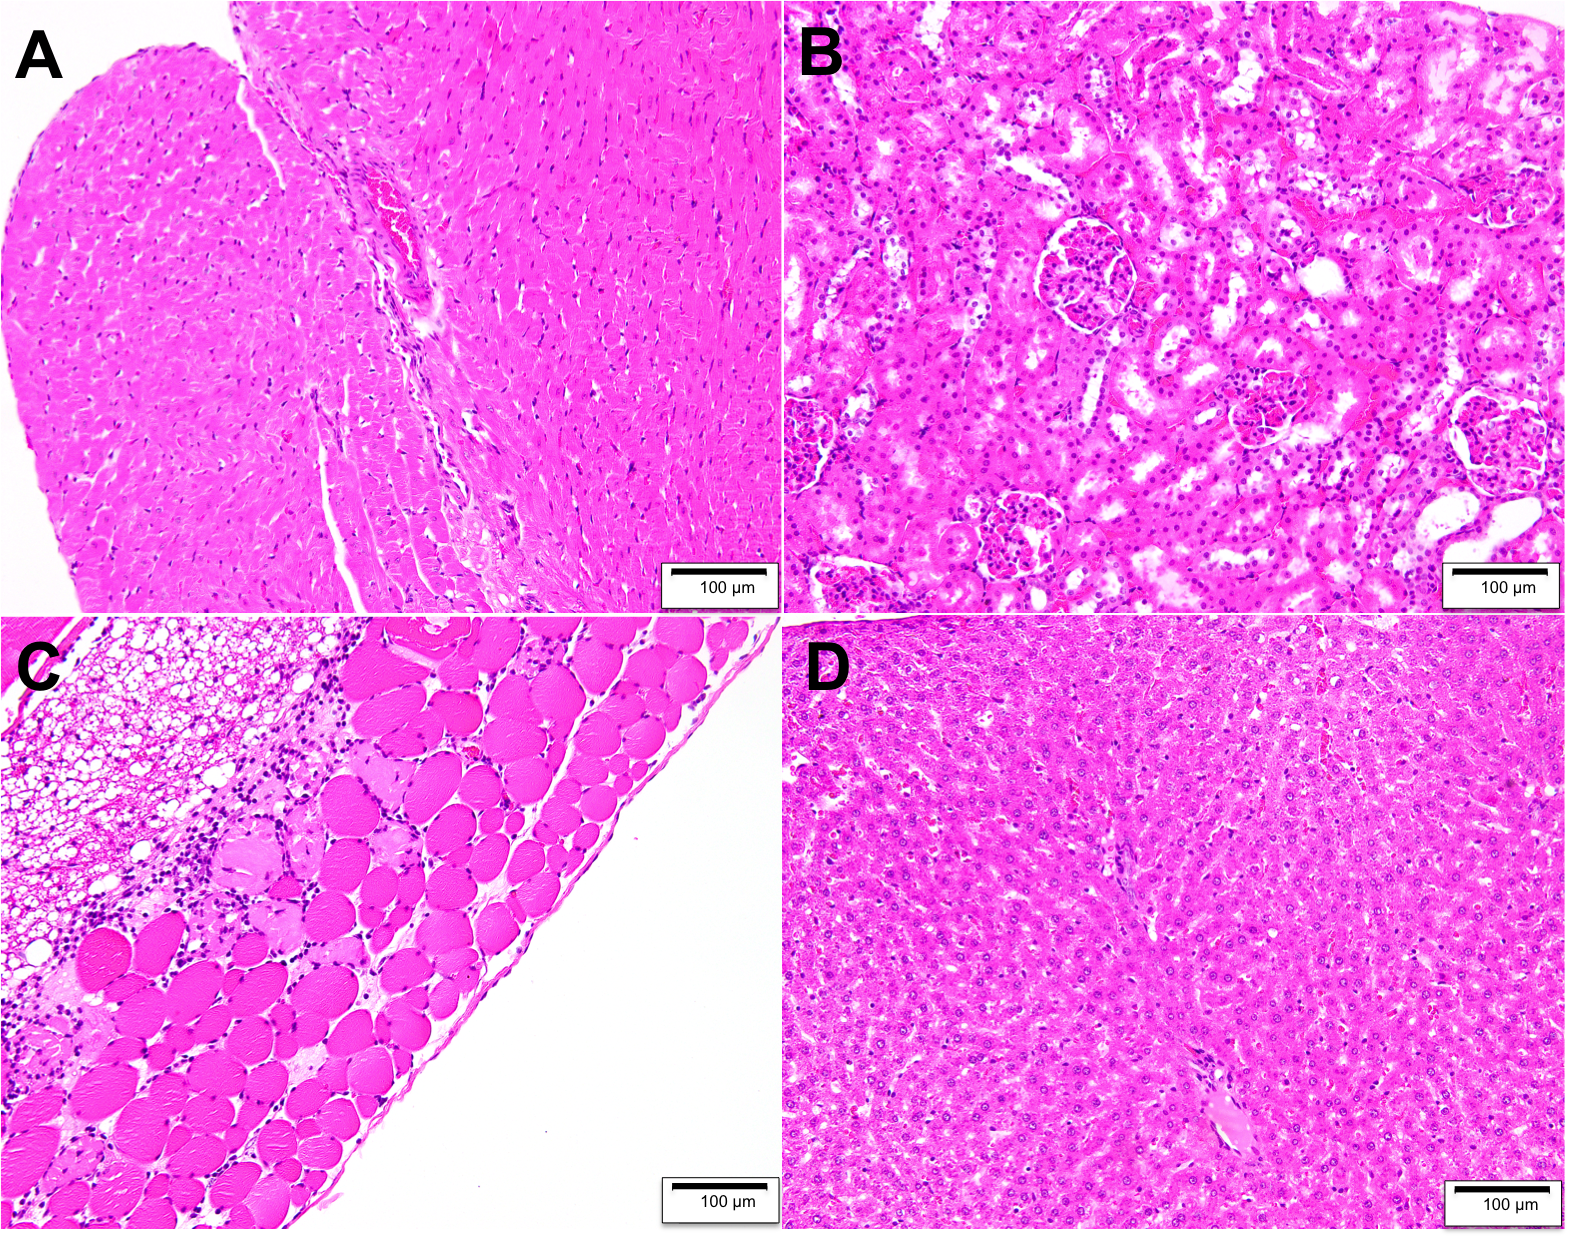


**Supplementary Figure 1:** **Representative H&E stained sections of rat tissues 48 h after intrapleural administration of liposomal curcumin.** A) heart, B) kidney, C) chest wall and D) liver
